# Supplementary material
Source: publisher figshare collection journal article supplement (https://acs.figshare.com/ndownloader/files/27410084)
Supplement: Supplementary file 1 [file 27410084]

## Sheet: Hoja1
Supplemental Table 6. List of protein groups diferentially expressed in Ventral root and Dorsal root axons
Protein.IDs	Protein.names	Gene.names	Log2(VR Axon/ DR Axon)	VR Axon VS DR Axon p value
P56571	ES1 protein homolog, mitochondrial		5.19627	0.0375002
O35952-2;O35952	Hydroxyacylglutathione hydrolase, mitochondrial	Hagh	3.75025	0.00978608
P54313;O35353	Guanine nucleotide-binding protein G(I)/G(S)/G(T) subunit beta-2;Guanine nucleotide-binding protein subunit beta-4	Gnb2;Gnb4	3.55859	0.00201579
P49187;P70618-2;P70618;Q9WTY9;Q63538;P49185;P49186-2;P49186	Mitogen-activated protein kinase 10;Mitogen-activated protein kinase 14;Mitogen-activated protein kinase 13;Mitogen-activated protein kinase 12;Mitogen-activated protein kinase 8;Mitogen-activated protein kinase 9	Mapk10;Mapk14;Mapk13;Mapk12;Mapk8;Mapk9	3.51139	0.0123384
Q9JJ19	Na(+)/H(+) exchange regulatory cofactor NHE-RF1	Slc9a3r1	3.15327	0.0375423
P10252	CD48 antigen	Cd48	3.07902	0.0133133
Q6P799	Serine--tRNA ligase, cytoplasmic	Sars	2.19239	0.0333214
P50503	Hsc70-interacting protein	St13	1.96723	0.0196772
Q62871-3;Q62871-2;Q62871	Cytoplasmic dynein 1 intermediate chain 2	Dync1i2	1.93167	0.0247224
Q5XI22	Acetyl-CoA acetyltransferase, cytosolic	Acat2	1.5471	0.0302629
P0C1X8	AP2-associated protein kinase 1	Aak1	1.45384	0.0428144
Q62698	Cytoplasmic dynein 1 light intermediate chain 2	Dync1li2	1.35393	0.0321573
Q9JLT0	Myosin-10	Myh10	1.25726	0.0355521
P62815	V-type proton ATPase subunit B, brain isoform	Atp6v1b2	0.93869	0.0312292
A7VJC2-3;A7VJC2-4;A7VJC2-2;A7VJC2	Heterogeneous nuclear ribonucleoproteins A2/B1	Hnrnpa2b1	0.889942	0.0193995
Q6MG55	Abhydrolase domain-containing protein 16A	Abhd16a	0.777054	0.0304672
P38650	Cytoplasmic dynein 1 heavy chain 1	Dync1h1	0.746573	0.00729756
Q9R0I8	Phosphatidylinositol 5-phosphate 4-kinase type-2 alpha	Pip4k2a	0.73877	0.0440796
Q5XIN6	LETM1 and EF-hand domain-containing protein 1, mitochondrial	Letm1	0.622114	0.0455663
P85108	Tubulin beta-2A chain	Tubb2a	0.576727	0.018073
Q5M7A7	CB1 cannabinoid receptor-interacting protein 1	Cnrip1	0.519468	0.0114015
Q9EQP5	Prolargin	Prelp	-0.256846	0.0483581
P13596	Neural cell adhesion molecule 1	Ncam1	-0.738727	0.00203711
P16290	Phosphoglycerate mutase 2	Pgam2	-0.752346	0.0319597
Q9EPH2	MARCKS-related protein	Marcksl1	-0.902079	0.0455463
Q8K1Q0	Glycylpeptide N-tetradecanoyltransferase 1	Nmt1	-0.902747	0.00592735
P02770	Serum albumin	Alb	-0.943238	0.0429947
Q1WIM1	Cell adhesion molecule 4	Cadm4	-1.06602	0.010349
Q60587	Trifunctional enzyme subunit beta, mitochondrial;3-ketoacyl-CoA thiolase	Hadhb	-1.07638	0.0343054
P23785	Granulins;Acrogranin;Granulin-1;Granulin-2;Granulin-3;Granulin-4;Granulin-5;Granulin-6;Granulin-7	Grn	-1.15915	0.00741033
Q5XI07	Lipoma-preferred partner homolog	Lpp	-1.23254	0.0144449
P02793;Q7TP54	Ferritin light chain 1;Protein FAM65B	Ftl1;Fam65b	-1.26503	0.0292798
P25304-3;P25304-4;P25304-2;P25304-5;P25304-6;P25304	Agrin;Agrin N-terminal 110 kDa subunit;Agrin C-terminal 110 kDa subunit;Agrin C-terminal 90 kDa fragment;Agrin C-terminal 22 kDa fragment	Agrn	-1.326	0.0370049
O88506	STE20/SPS1-related proline-alanine-rich protein kinase	Stk39	-1.55678	0.0264727
P41498;P41498-2	Low molecular weight phosphotyrosine protein phosphatase	Acp1	-1.59399	0.0051902
P09006	Serine protease inhibitor A3N	Serpina3n	-1.70725	0.0210075
Q8VII6-2;Q8VII6	Choline transporter-like protein 1	Slc44a1	-1.81249	0.0449623
Q64559-1;Q64559	Cytosolic acyl coenzyme A thioester hydrolase	Acot7	-1.93602	0.0488321
P14046	Alpha-1-inhibitor 3	A1i3	-1.9493	0.0391658
Q9ESH6	Glutaredoxin-1	Glrx	-1.9517	0.0348339
Q68FY0	Cytochrome b-c1 complex subunit 1, mitochondrial	Uqcrc1	-1.96496	0.0211828
P06907	Myelin protein P0	Mpz	-2.10288	0.027547
Q64240	Protein AMBP;Alpha-1-microglobulin;Inter-alpha-trypsin inhibitor light chain;Trypstatin	Ambp	-2.16166	0.0337041
P04642;P19629	L-lactate dehydrogenase A chain	Ldha	-2.16323	0.0404594
P11530	Dystrophin	Dmd	-2.17671	0.038848
Q78P75;P63170	Dynein light chain 2, cytoplasmic;Dynein light chain 1, cytoplasmic	Dynll2;Dynll1	-2.17987	0.0329524
P02688;P02688-2	Myelin basic protein	Mbp	-2.23437	0.0476858
Q99PF5	Far upstream element-binding protein 2	Khsrp	-2.24275	0.0154437
P04041	Glutathione peroxidase 1	Gpx1	-2.35739	0.0418519
P29266	3-hydroxyisobutyrate dehydrogenase, mitochondrial	Hibadh	-2.36537	0.0190468
P02650	Apolipoprotein E	Apoe	-2.84458	0.0181862
Q4V8B0;Q4V8B0-3;Q4V8B0-2	Oxidation resistance protein 1	Oxr1	-2.86694	0.0252566
P80254	D-dopachrome decarboxylase	Ddt	-2.8801	0.035319
Q9Z2L0	Voltage-dependent anion-selective channel protein 1	Vdac1	-3.23828	0.0313836
Q62951	Dihydropyrimidinase-related protein 4	Dpysl4	-3.38346	0.040964
P36202	PDZ and LIM domain protein 4	Pdlim4	-3.40602	0.00101691
P01830	Thy-1 membrane glycoprotein	Thy1	-3.52017	0.00698408
P82471;Q9JID2	Guanine nucleotide-binding protein G(q) subunit alpha	Gnaq	-4.26813	0.0144992
Q920Q0	Paralemmin-1	Palm	-4.2902	0.0290136
P62762	Visinin-like protein 1	Vsnl1	-4.67099	0.0371288
Q1WIM3	Cell adhesion molecule 3	Cadm3	-5.39583	0.0206839
Q499N6	UBX domain-containing protein 1	Ubxn1	-5.40175	3.59667e-06
Yellow indicates enrichment in VR axons and green in dorsal root axons (FC > 2 and p value < 0.05)
